# Supplementary material for: Circadian and feeding cues integrate to drive rhythms of physiology in Drosophila insulin-producing cells
Source: PubMed Central journal article supplement — Genes Dev. 2016 Dec 1;30(23):2596–606. doi: 10.1101/gad.288258.116 (PMC5204352; doi:10.1101/gad.288258.116), 2016-12-01
Supplement: supp_gad.288258.116_Supplemental_Fig_S2.pdf [file supp_gad.288258.116_Supplemental_Fig_S2.pdf]

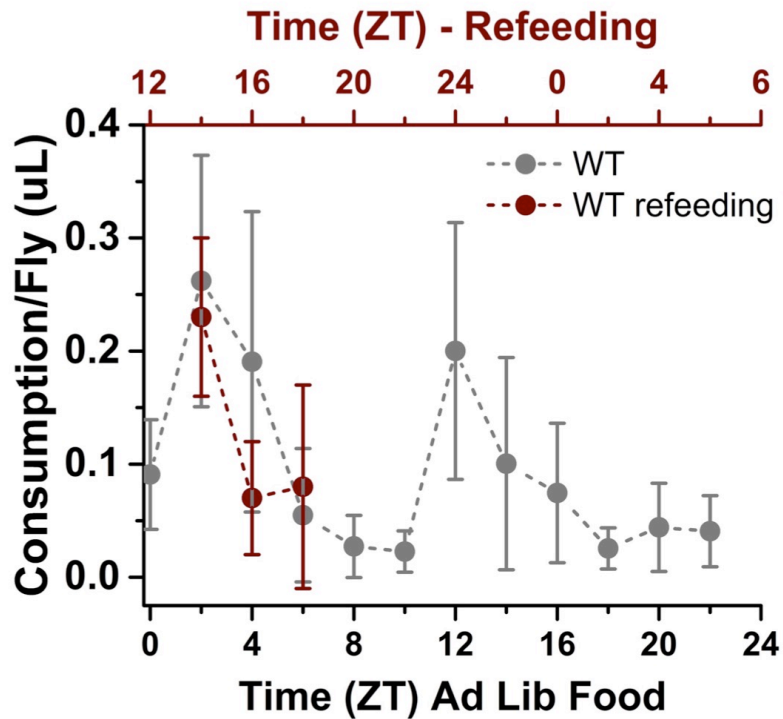

**Figure S2:** Night-time refeeding of flies after starvation mimics morning consumption. WT flies were subjected to the restricted feeding paradigm used for electrophysiology in Figure 6. Refeeding flies from ZT 12-18 after 18 hours of starvation (red symbols and upper X-axis) mimicked the amplitude of the morning feeding peak observed in WT flies fed *ad lib* (grey symbols and lower axis). N = 10 groups per condition.
